# Supplementary material
Source: publisher site journal article supplement (https://www.dovepress.com/get_supplementary_file.php?f=413632.docx)
Supplement: Supplementary file 1 [file get_supplementary_file.php]

**
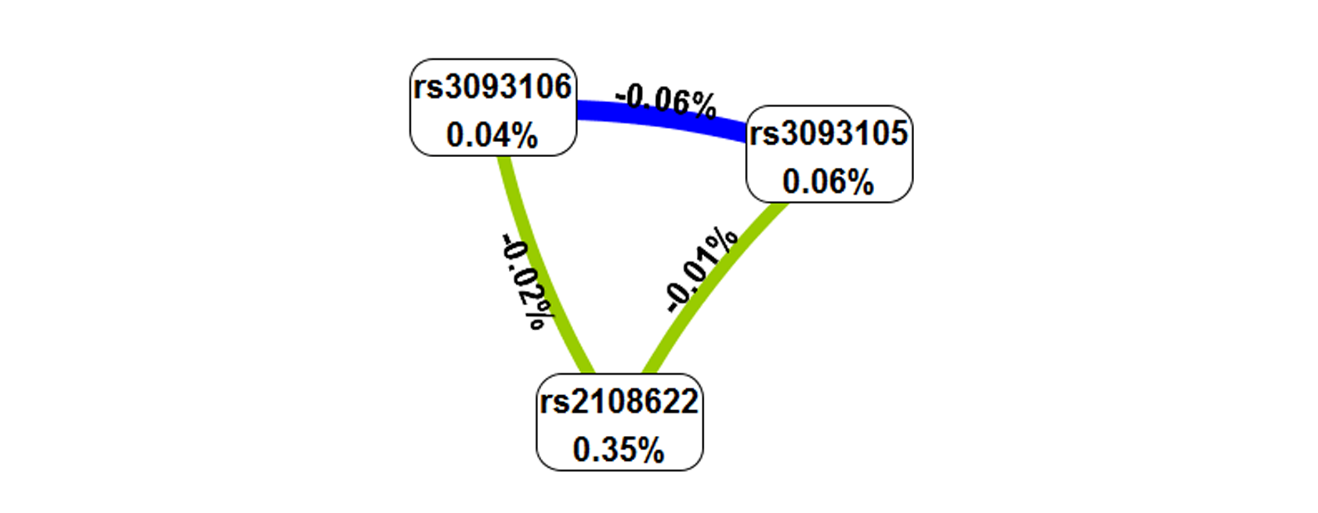
**

**Supplemental Figure 1** Multifactor dimensionality reduction (MDR) analysis of interaction between three candidate SNPs of *CYP4F2* (rs2108622, rs3093106, and rs3093105). Fruchterman-Reingold: values in nodes represent the IGs of individual attribute (main effects). Values between nodes are IGs of each pair of attributes (interaction effects).

**Supplemental Table 1** The primers for *CYP4F2* gene amplification and sequencing.

| **SNP** |  | **Forward Primer Sequence** | **Reverse Primer Sequence** | **UEP Sequence** |
| --- | --- | --- | --- | --- |
| rs2108622 |  | ACGTTGGATGTGCCTCATCAGTGTTTTCGG | ACGTTGGATGCTAGGAGCCTTGGAATGGAC | cccccCAGGGTCCGGCCACA |
| rs3093106 |  | ACGTTGGATGTGGTGTCCCCAAAACCAGTT | ACGTTGGATGCCTACGCCTTCTATGACAAC | ttcgtTGTTTCCCACAACCCCC |
| rs3093105 |  | ACGTTGGATGTGTCATAGAAGGCGTAGGTC | ACGTTGGATGATGTCCCAGCTGAGCCTGT | gggttAGCCTGTCCTGGCTGGGCCTC |

SNP, single nucleotide polymorphism; UEP, Unique.

**Supplemental Table 2** Association between candidate SNPs in *CYP4F2* and susceptibility to IS.

| **SNP ID** | **Model** | **Genotype** | **IS complicated with CHD** | |  | **IS complicated with diabetes** | |
| --- | --- | --- | --- | --- | --- | --- | --- |
| **Yes VS. No** | |  | **Yes VS. No** | |
| **OR (95% CI)** | ***p*-value** |  | **OR (95% CI)** | ***p*-value** |
| rs2108622 | Allele | G | 1 |  |  | 1 |  |
|  |  | A | 0.91 (0.68-1.22) | 0.532 |  | 0.93 (0.68-1.27) | 0.636 |
|  | Codominant | GG | 1 |  |  | 1 |  |
|  |  | AA | 0.76 (0.37-1.55) | 0.444 |  | 0.95 (0.47-1.9) | 0.883 |
|  |  | GA | 0.96 (0.64-1.46) | 0.857 |  | 0.79 (0.51-1.22) | 0.283 |
|  | Dominant | GG | 1 |  |  | 1 |  |
|  |  | GA-AA | 0.92 (0.62-1.37) | 0.680 |  | 0.82 (0.54-1.23) | 0.340 |
|  | Recessive | GG-GA | 1 |  |  | 1 |  |
|  |  | AA | 0.77 (0.39-1.53) | 0.450 |  | 1.06 (0.55-2.07) | 0.860 |
|  | Overdominant | GG-AA | 1 |  |  | 1 |  |
|  |  | GA | 1.01 (0.68-1.50) | 0.960 |  | 0.79 (0.52-1.21) | 0.280 |
|  | Log-additive | - | 0.90 (0.67-1.22) | 0.510 |  | 0.90 (0.66-1.24) | 0.520 |
| rs3093106 | Allele | T | 1 |  |  | 1 |  |
|  |  | A | 1.03 (0.68-1.57) | 0.884 |  | 1.17 (0.76-1.8) | 0.481 |
|  | Codominant | TT | 1 |  |  | 1 |  |
|  |  | CC | 0.48 (0.06-3.91) | 0.489 |  | 4.09 (1.05-15.87) | 0.052 |
|  |  | CT | 1.12 (0.69-1.8) | 0.652 |  | 0.91 (0.54-1.54) | 0.736 |
|  | Dominant | TT | 1 |  |  | 1 |  |
|  |  | CT-CC | 1.07 (0.67-1.71) | 0.790 |  | 1.04 (0.64-1.71) | 0.860 |
|  | Recessive | TT-CT | 1 |  |  | 1 |  |
|  |  | CC | 0.46 (0.06-3.81) | 0.430 |  | 4.16 (1.08-16.09) | 0.050 |
|  | Overdominant | TT-CC | 1 |  |  | 1 |  |
|  |  | CT | 1.13 (0.70-1.82) | 0.620 |  | 0.88 (0.52-1.49) | 0.640 |
|  | Log-additive | - | 1.01 (0.66-1.55) | 0.950 |  | 1.18 (0.76-1.82) | 0.470 |
| rs3093105 | Allele | A | 1 |  |  | 1 |  |
|  |  | C | 0.99 (0.65-1.51) | 0.980 |  | 1.13 (0.73-1.74) | 0.587 |
|  | Codominant | AA | 1 |  |  | 1 |  |
|  |  | CC | 0.47 (0.06-3.88) | 0.484 |  | 4.06 (1.05-15.75) | 0.053 |
|  |  | CA | 1.07 (0.67-1.73) | 0.768 |  | 0.88 (0.52-1.49) | 0.636 |
|  | Dominant | AA | 1 |  |  | 1 |  |
|  |  | CA-CC | 1.03 (0.65-1.64) | 0.900 |  | 1.01 (0.62-1.65) | 0.970 |
|  | Recessive | AA-CA | 1 |  |  | 1 |  |
|  |  | CC | 0.46 (0.06-3.81) | 0.430 |  | 4.16 (1.08-16.09) | 0.050 |
|  | Overdominant | AA-CC | 1 |  |  | 1 |  |
|  |  | CA | 1.09 (0.68-1.75) | 0.730 |  | 0.85 (0.51-1.44) | 0.540 |
|  | Log-additive | - | 0.98 (0.64-1.51) | 0.940 |  | 1.14 (0.74-1.77) | 0.550 |

IS, Ischemic stroke; CHD, coronary heart disease; SNP, single nucleotide polymorphisms; OR, odds ratio; CI, confidence interval.

“-” indicates log-additive model.

**Supplemental Table 3** The FPRP and statistical power analysis for all the positive results.

| **SNP ID** | **Model** | **Genotype** | **OR (95%CI)** | ***p*** | **S****tatistical Power a (%)** | **Prior probability** | | |
| --- | --- | --- | --- | --- | --- | --- | --- | --- |
| **0.25** | **0.1** | **0.01** |
| **Overall analysis** |  |  |  |  |  |  |  |  |
| rs2108622 | Allele | A | 1.24 (1.05-1.46) | 0.012 | 100.00% | **0.029 *** | **0.081 *** | 0.493 |
|  | Codominant | AA | 1.49 (1.01-2.22) | 0.047 | 92.61% | **0.139 *** | 0.327 | 0.842 |
|  |  | GA | 1.26 (1.01-1.58) | 0.046 | 100.00% | **0.120 *** | 0.290 | 0.818 |
|  | Dominant | GA-AA | 1.30 (1.05-1.61) | 0.018 | 100.00% | **0.046 *** | **0.127 *** | 0.616 |
|  | Log-additive | - | 1.24 (1.05-1.46) | 0.012 | 100.00% | **0.029 *** | **0.081 *** | 0.493 |
| **Female** |  |  |  |  |  |  |  |  |
| rs2108622 | Allele | A | 1.37 (1.03-1.82) | 0.032 | 99.55% | **0.082 *** | 0.212 | 0.748 |
|  | Codominant | GA | 1.66 (1.11-2.48) | 0.013 | 81.85% | **0.047 *** | **0.128 *** | 0.617 |
|  | Dominant | GA-AA | 1.63 (1.11-2.38) | 0.013 | 85.53% | **0.038 *** | **0.107 *** | 0.569 |
|  | Overdominant | GA | 1.57 (1.07-2.31) | 0.021 | 89.04% | **0.069 *** | **0.182 *** | 0.710 |
|  | Log-additive | - | 1.38 (1.02-1.87) | 0.034 | 99.17% | **0.102 *** | 0.255 | 0.790 |
| **Age > 60 years old** |  |  |  |  |  |  |  |  |
| rs2108622 | Allele | A | 1.29 (1.06-1.59) | 0.013 | 100.00% | **0.048 *** | **0.133 *** | 0.627 |
|  | Codominant | GA | 1.43 (1.06-1.92) | 0.019 | 98.72% | **0.050 *** | **0.137 *** | 0.635 |
|  | Dominant | GA-AA | 1.49 (1.12-1.98) | 0.005 | 97.88% | **0.018 *** | **0.052 *** | 0.377 |
|  | Log-additive | - | 1.38 (1.11-1.72) | 0.003 | 99.95% | **0.012 *** | **0.036 *** | 0.291 |
| **BMI ≥ 24 kg/m2** |  |  |  |  |  |  |  |  |
| rs2108622 | Allele | A | 1.34 (1.01-1.79) | 0.044 | 99.66% | **0.125 *** | 0.301 | 0.825 |
|  | Log-additive | - | 1.39 (1.03-1.87) | 0.031 | 99.19% | **0.082 *** | 0.212 | 0.747 |
| **Smoking (Yes)** |  |  |  |  |  |  |  |  |
| rs2108622 | Allele | A | 1.32 (1.03-1.68) | 0.026 | 99.96% | **0.067 *** | **0.178 *** | 0.704 |
|  | Codominant | GA | 1.56 (1.12-2.18) | 0.009 | 92.72% | **0.029 *** | **0.082 *** | 0.496 |
|  | Dominant | GA-AA | 1.56 (1.13-2.14) | 0.006 | 93.83% | **0.018 *** | **0.053 *** | 0.381 |
|  | Overdominant | GA | 1.46 (1.06-2.01) | 0.022 | 97.32% | **0.059 *** | **0.158 *** | 0.674 |
|  | Log-additive | - | 1.36 (1.07-1.74) | 0.013 | 99.89% | **0.042 *** | **0.115 *** | 0.589 |
| rs3093106 | Codominant | CT | 1.52 (1.01-2.29) | 0.044 | 90.53% | **0.130 *** | 0.310 | 0.832 |
|  | Dominant | CT-CC | 1.50 (1.00-2.24) | 0.047 | 92.02% | **0.134 *** | 0.317 | 0.836 |
|  | Overdominant | CT | 1.52 (1.01-2.29) | 0.043 | 90.53% | **0.130 *** | 0.310 | 0.832 |
| rs3093105 | Codominant | CA | 1.60 (1.06-2.40) | 0.024 | 85.96% | **0.075 *** | **0.195 *** | 0.727 |
|  | Dominant | CA-CC | 1.57 (1.06-2.34) | 0.025 | 88.28% | **0.083 *** | 0.214 | 0.750 |
|  | Overdominant | CA | 1.60 (1.06-2.39) | 0.023 | 86.21% | **0.070 *** | **0.185 *** | 0.714 |
|  | Log-additive | - | 1.48 (1.02-2.15) | 0.036 | 94.30% | **0.112 *** | 0.274 | 0.806 |
| **Drinking (Yes)** |  |  |  |  |  |  |  |  |
| rs2108622 | Allele | A | 1.37 (1.07-1.74) | 0.011 | 99.90% | **0.029 *** | **0.082 *** | 0.494 |
|  | Dominant | GA-AA | 1.45 (1.06-1.99) | 0.018 | 97.68% | **0.062 *** | **0.165 *** | 0.685 |
|  | Log-additive | - | 1.38 (1.08-1.75) | 0.010 | 99.89% | **0.023 *** | **0.066 *** | 0.438 |
| rs3093106 | Codominant | CT | 1.50 (1.00-2.24) | 0.048 | 92.02% | **0.134 *** | 0.317 | 0.836 |
|  | Overdominant | CT | 1.51 (1.01-2.25) | 0.042 | 91.64% | **0.123 *** | 0.296 | 0.822 |
| rs3093105 | Codominant | CA | 1.55 (1.04-2.31) | 0.032 | 89.47% | **0.095 *** | 0.240 | 0.776 |
|  | Overdominant | CA | 1.56 (1.05-2.32) | 0.028 | 89.01% | **0.086 *** | 0.221 | 0.758 |
| **IS complicated with hypertension** |  |  |  |  |  |  |  |  |
| rs3093106 | Codominant | CT | 1.70 (1.09-2.66) | 0.020 | 76.16% | **0.074 *** | **0.193 *** | 0.724 |
|  | Dominant | CT-CC | 1.57 (1.03-2.41) | 0.034 | 86.59% | **0.119 *** | 0.289 | 0.817 |
|  | Overdominant | CT | 1.71 (1.10-2.68) | 0.015 | 75.28% | **0.071 *** | **0.187 *** | 0.717 |
| rs3093105 | Codominant | CA | 1.69 (1.09-2.63) | 0.020 | 77.23% | **0.072 *** | **0.189 *** | 0.720 |
|  | Dominant | CA-CC | 1.57 (1.03-2.39) | 0.033 | 87.06% | **0.109 *** | 0.268 | 0.801 |
|  | Overdominant | CA | 1.70 (1.10-2.65) | 0.015 | 76.35% | **0.070 *** | **0.184 *** | 0.713 |

FPRP: false-positive report probability.

a Statistical power a was calculated using the number of observations in the subgroup and the OR and p values in this table.

‘*’ and ‘bold text’ indicate noteworthy findings (The level of false-positive report probability threshold was set at 0.2).
